# Supplementary material for: Epithelial GPR35 protects from Citrobacter rodentium infection by preserving goblet cells and mucosal barrier integrity
Source: PubMed Central journal article supplement (PMC9038528; doi:10.1038/s41385-022-00494-y), 2022-03-09
Supplement: 41385_2022_494_MOESM1_ESM.pdf [file 41385_2022_494_MOESM1_ESM.pdf]

# Figure S1

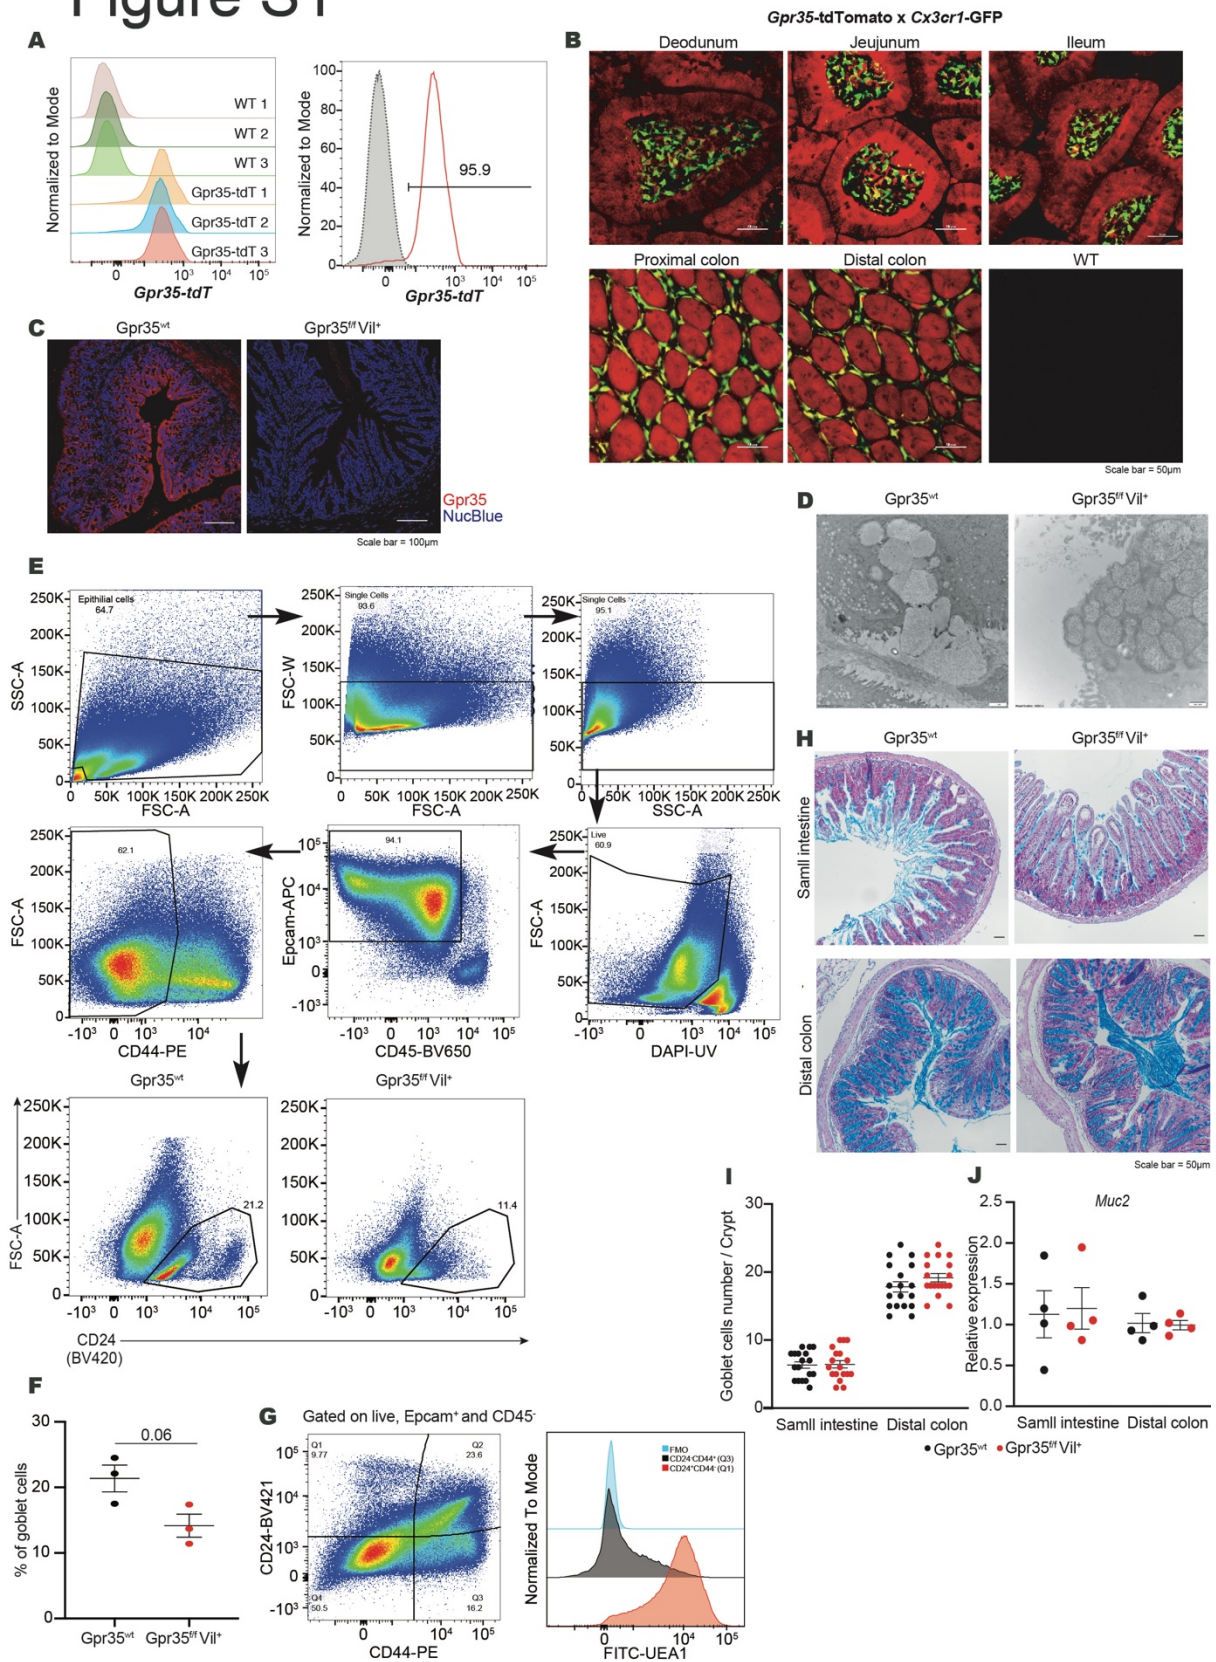

**Figure S1. Epithelial cell-specific *Gpr35* deletion reduces goblet cell numbers**

- (A) Representative *Gpr35*-tdTomato expression by flow cytometry in epithelial cells (Epcam<sup>+</sup>, CD45<sup>-</sup>) from the proximal colon of *Gpr35*-tdTomato reporter mice (red unfilled histograms) and *Gpr35*<sup>wt</sup> mice (gray histograms) as the background control.
- (B) *Ex vivo* fluorescence imaging of duodenum, jejunum, ileum, proximal colon and distal colon from *Gpr35*-tdTomato (red) x *Cx3cr1*-GFP (green) double reporter mice. The last panel shows the colon from a WT mouse as the background control.
- (C) Confocal immunofluorescence images of proximal colon sections obtained from *Gpr35*<sup>fl/fl</sup>*Vil*<sup>+</sup> and *Gpr35*<sup>wt</sup> littermates and stained for *Gpr35* (red) and DAPI (blue). Scale bars, 100 μm.
- (D) Transmission electron microscopy analysis of goblet cell morphology in the proximal colon of *Gpr35*<sup>fl/fl</sup>*Vil*<sup>+</sup> and *Gpr35*<sup>wt</sup> co-housed littermates. Scale bars, 5 μm.
- (E) Flow cytometry analysis of goblet cell percentages in the proximal colon of *Gpr35*<sup>fl/fl</sup>*Vil*<sup>+</sup> and *Gpr35*<sup>wt</sup> co-housed littermates.
- (F) Quantification of data from (E) indicating the percentages of goblet cells (n = 3) in each group.
- (G) Flow cytometry analysis of UEA1 percentage in the CD24<sup>-</sup>CD44<sup>+</sup> and CD24<sup>+</sup>CD44<sup>+</sup> populations.
- (H) Representative AB/PAS staining of small intestine and distal colon sections obtained from *Gpr35*<sup>fl/fl</sup>*Vil*<sup>+</sup> and *Gpr35*<sup>wt</sup> co-housed littermates. Scale bars, 50 μm.
- (I) Cell count of goblet cells in (H) performed blindly by two different investigators in at least 30 crypts.
- (J) mRNA expression levels of *Muc2* measured by RT-qPCR in small intestine and distal colon samples obtained from *Gpr35*<sup>fl/fl</sup>*Vil*<sup>+</sup> (n = 4) and *Gpr35*<sup>wt</sup> co-housed littermates (n = 4). Data are represented as mean ± SEM ns, not significant by Mann-Whitney test.

# Figure S2

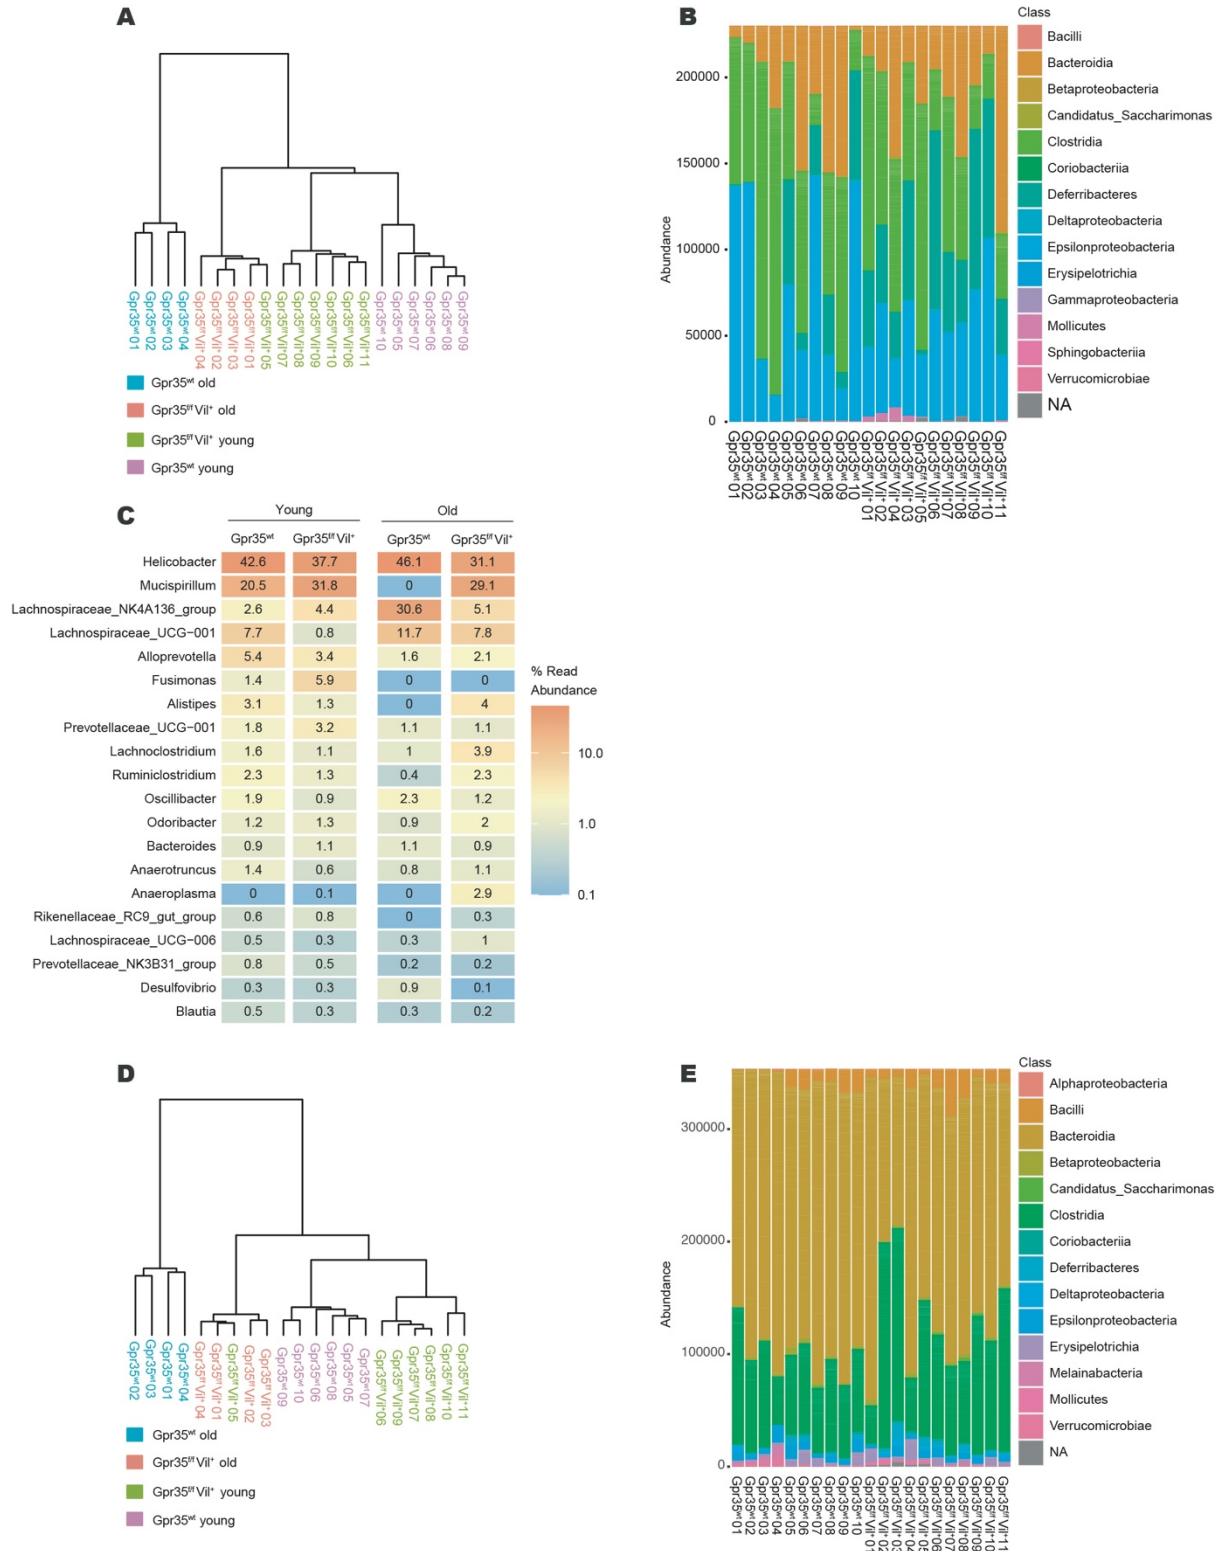

**Figure S2. Epithelial cell-specific *Gpr35* deletion correlates with an altered mucosa-associated microbiome**

(A) Hierarchical clustering of mucosal bacterial samples based on Bray-Curtis dissimilarity and Ward's minimum variance method (ward.D2).

(B) Relative abundance of mucosal bacterial communities at the class level in *Gpr35<sup>fl/fl</sup>Vil<sup>+</sup>* and *Gpr35<sup>wt</sup>* mice at different age points.

(C) Relative abundance of taxonomic groups at the genus level averaged across mucosa-associated bacteria samples of old and young *Gpr35<sup>fl/fl</sup>Vil<sup>+</sup>* and *Gpr35<sup>wt</sup>* littermates.

(D) Hierarchical clustering of fecal bacterial samples based on Bray-Curtis dissimilarity and Ward's minimum variance method (ward.D2).

(E) Relative abundance of fecal bacterial communities at the class level in *Gpr35<sup>fl/fl</sup>Vil<sup>+</sup>* and *Gpr35<sup>wt</sup>* mice at different age points.

# Figure S3

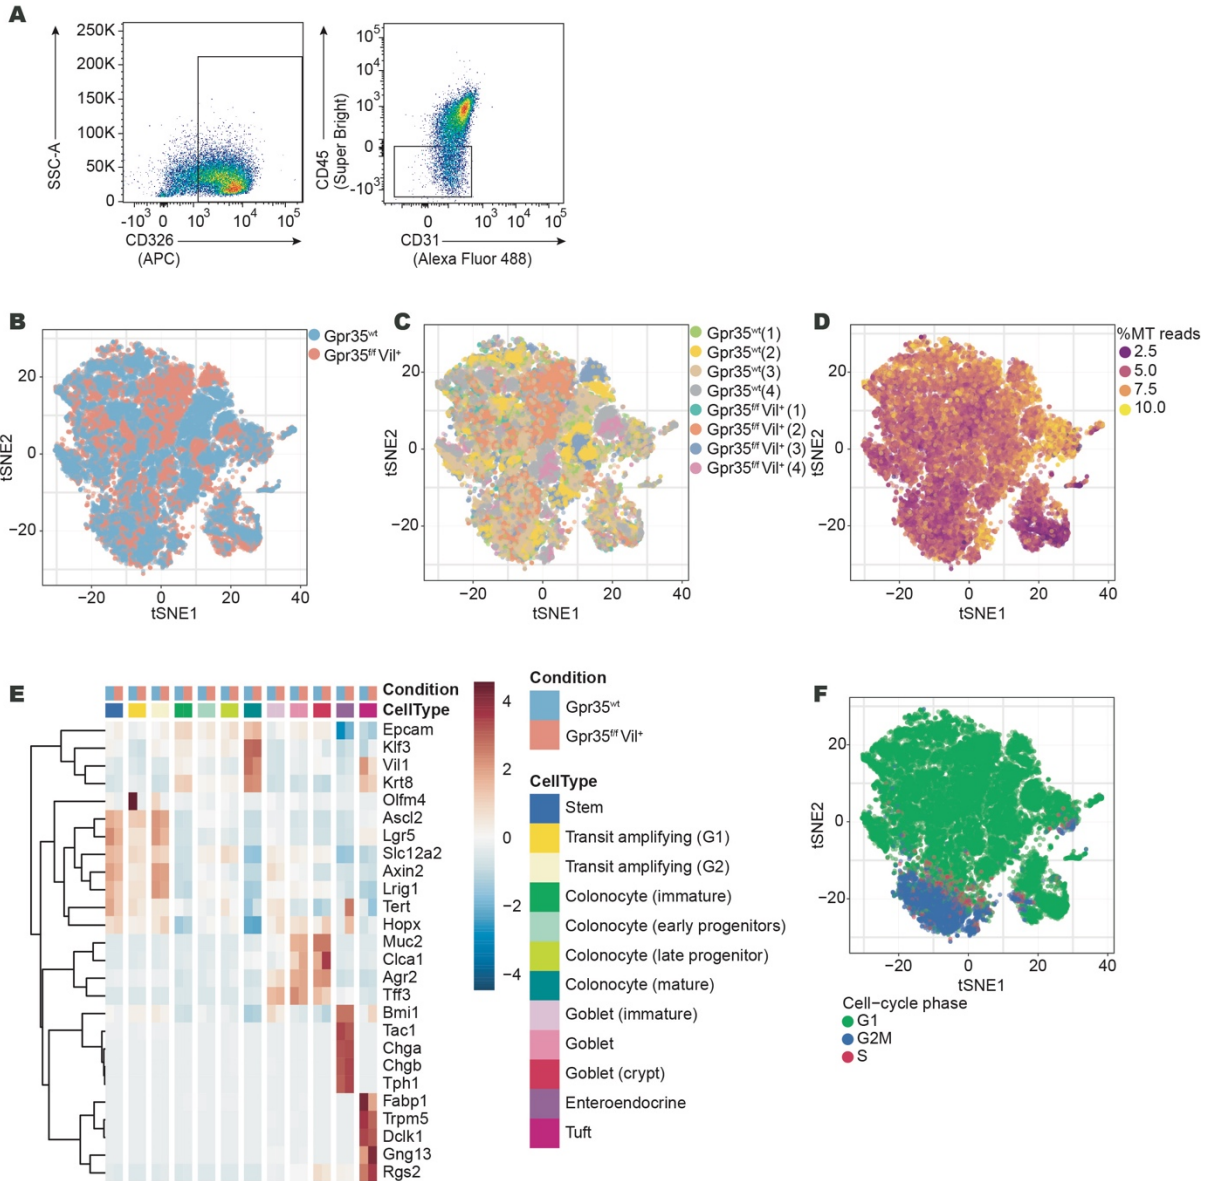

**Figure S3. Heterogeneity of colonic epithelial cells in *Gpr35<sup>fl</sup>Vil<sup>+</sup>* mice**

(A) Flow cytometry analysis of cells isolated from proximal colons of *Gpr35<sup>fl</sup>Vil<sup>+</sup>* and *Gpr35<sup>wt</sup>* co-housed littermates before scRNA-seq.

(B-D, F) *t*-SNE plot showing proximal colonic epithelial cells from *Gpr35<sup>fl</sup>Vil<sup>+</sup>* (n = 4) and *Gpr35<sup>wt</sup>* (n = 4) co-housed littermates assayed via scRNA-seq, and highlighting: (B) the distribution of *Gpr35<sup>fl</sup>Vil<sup>+</sup>* and *Gpr35<sup>wt</sup>* cells; (C) the distribution of cells from individual mice replicates; (D) the percentage of reads originating from mitochondrial genes; (F) the inferred cell-cycle phase.

(E) Heatmap showing the centered and scaled average expression across cell types and conditions of known cell type marker genes.

# Figure S4

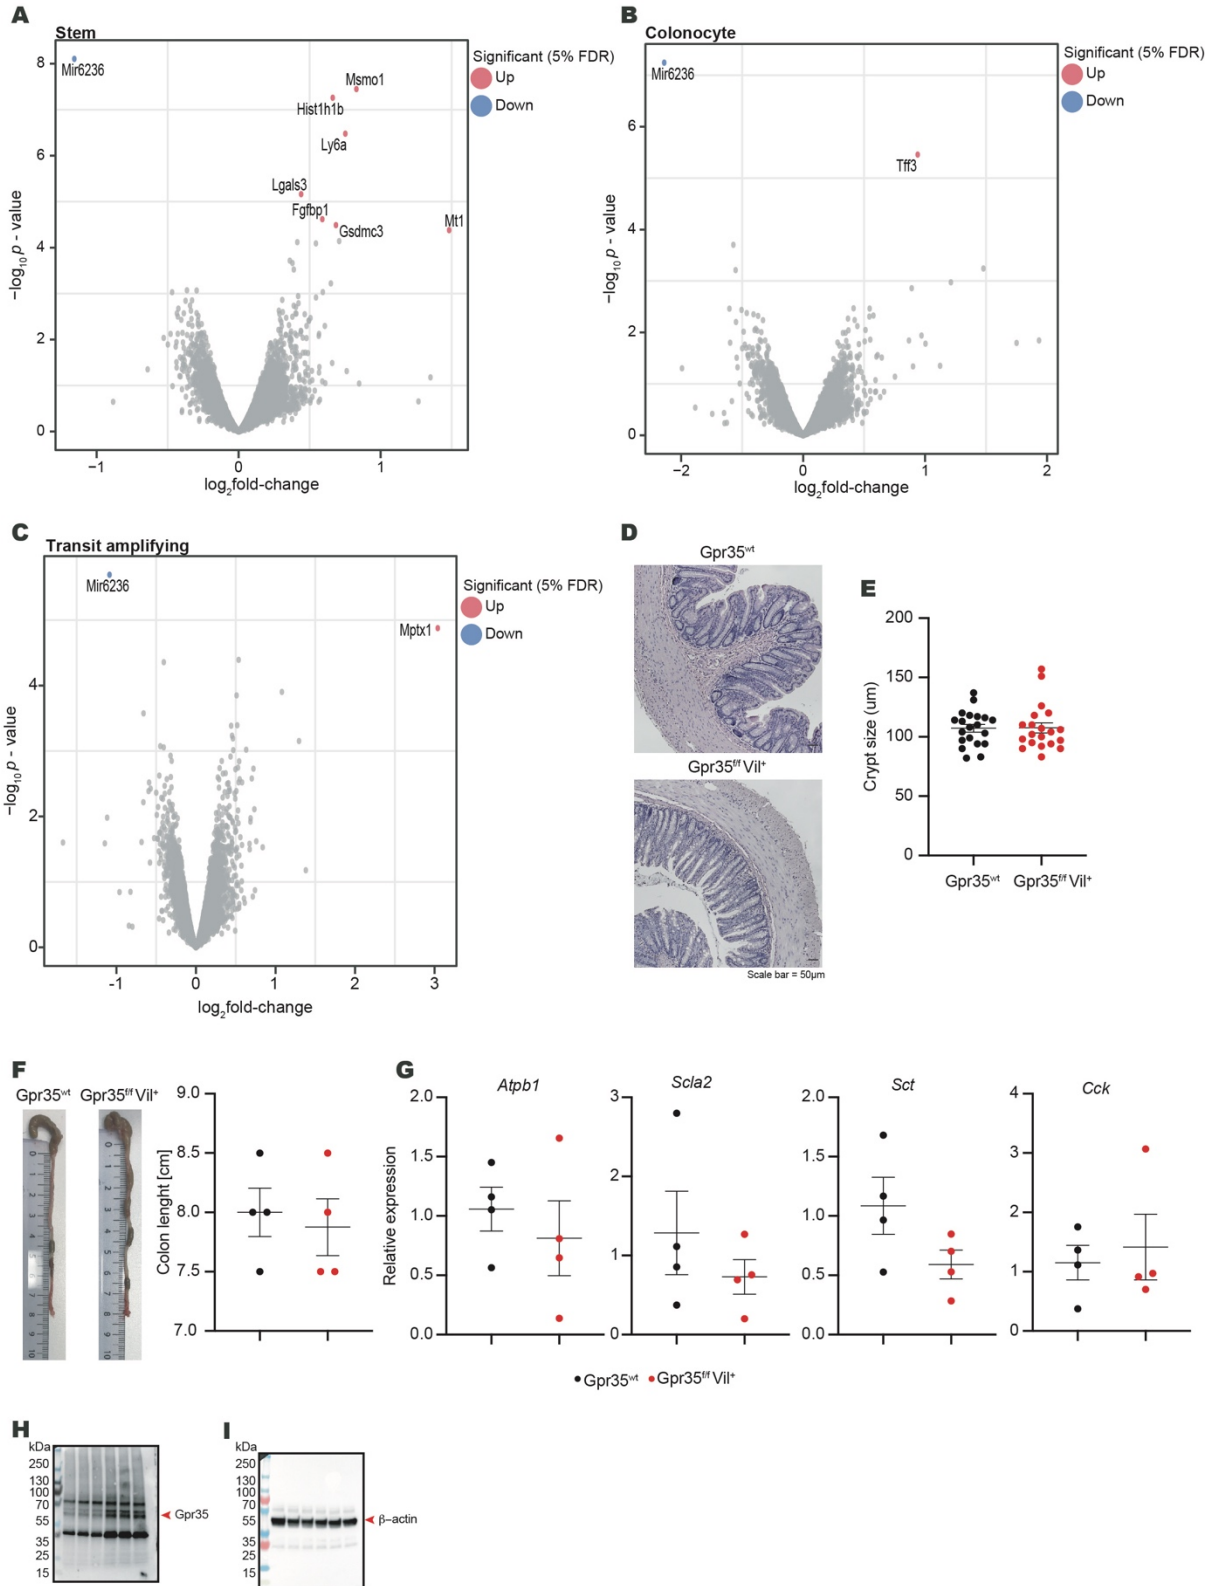

**Figure S4. Increased pyroptotic signatures in goblet cells lacking epithelial *Gpr35***

(A-C) Volcano plot showing genes differentially expressed in *Gpr35<sup>fl/fl</sup>Vil<sup>+</sup>* (n = 4) and *Gpr35<sup>wt</sup>* (n = 4) (A) stem cells, (B) colonocytes or (C) transit amplifying cells. Figure legend similar to Figure 4A. *Gpr35* was omitted from the plots for readability.

(D) Representative H&E images of proximal colon sections obtained from *Gpr35<sup>fl/fl</sup>Vil<sup>+</sup>* and *Gpr35<sup>wt</sup>* littermates.

(E) Crypt size quantification from (D).

(F) Colon lengths of 10-week-old *Gpr35<sup>fl/fl</sup>Vil<sup>+</sup>* and *Gpr35<sup>wt</sup>* mice.

(G) mRNA expression levels of *Atpb1*, *Scla2*, *Sct* and *Cck* measured by qRT-PCR in proximal colon samples obtained from *Gpr35<sup>fl/fl</sup>Vil<sup>+</sup>* (n = 4) and *Gpr35<sup>wt</sup>* littermates (n = 4).

Each dot represents one animal with medians. Data are represented as mean  $\pm$  SEM \*p  $\leq$  0.05, \*\*p  $\leq$  0.01, \*\*\*p  $\leq$  0.001, \*\*\*\*p  $\leq$  0.0001 by Mann-Whitney in (E), (F) and (G).

(H-I) Whole membrane images of western blots represented in Figure 4F.



# Figure S5

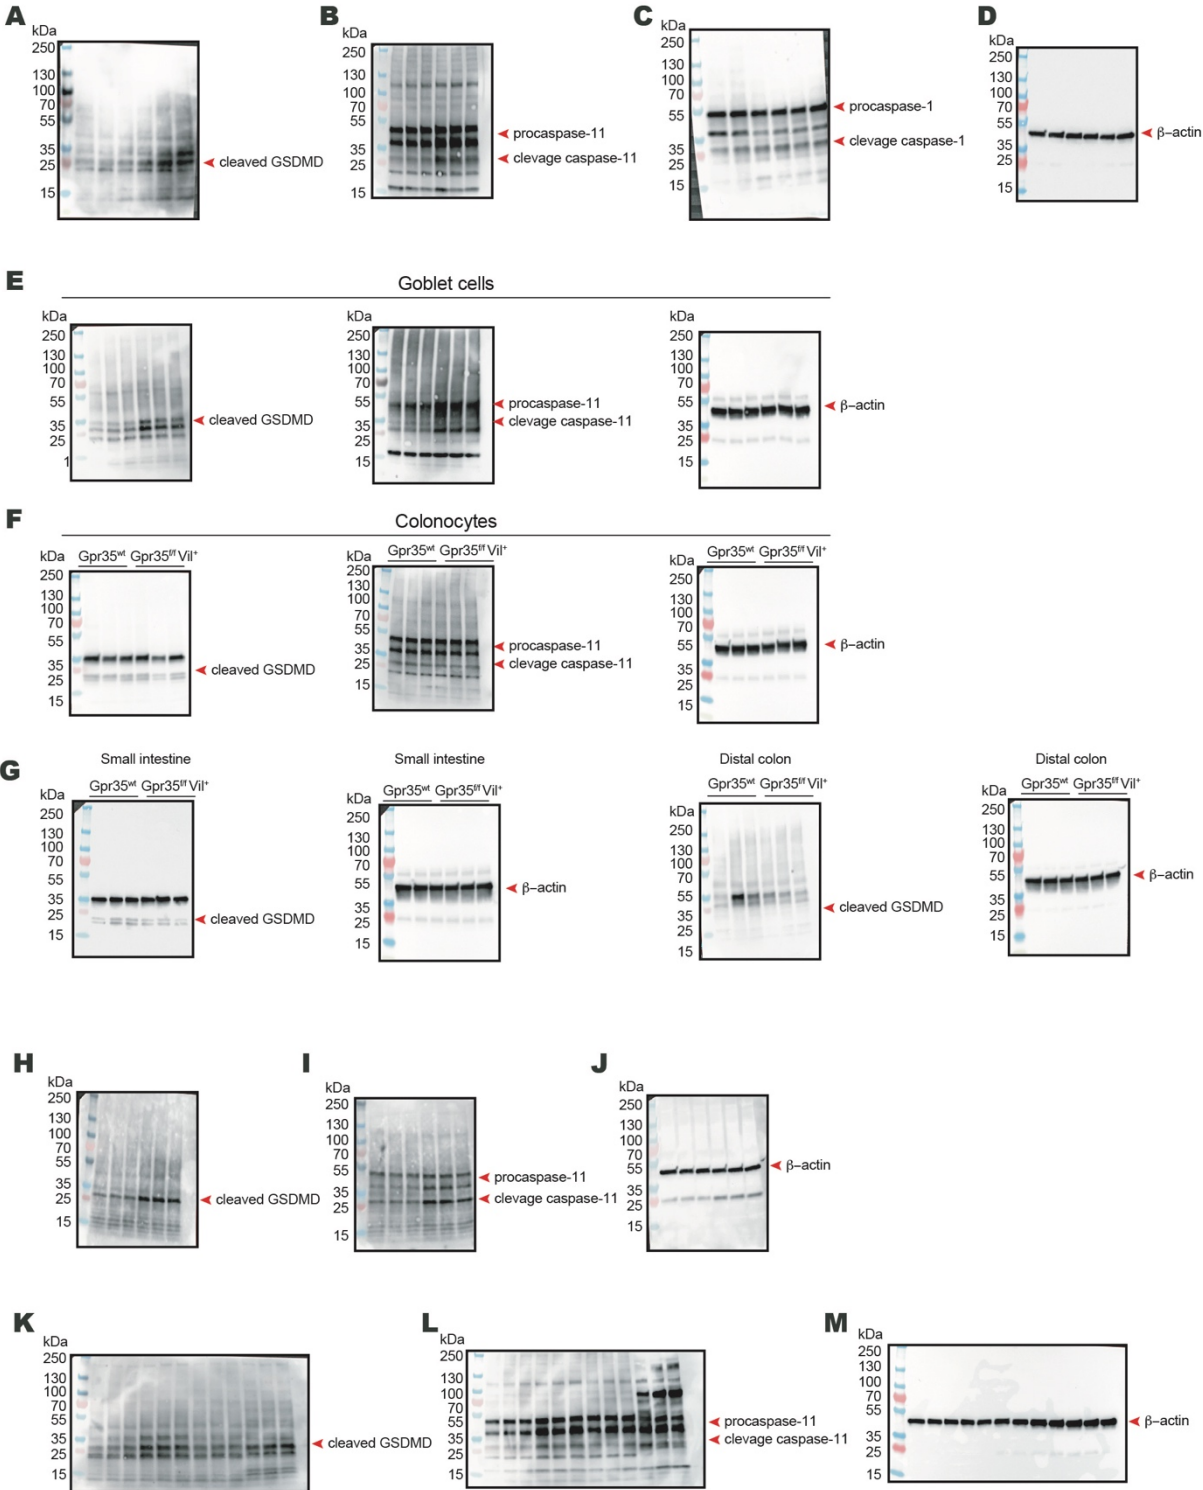

**Figure S5. Pyroptosis upon *Gpr35* deletion is caspase-11 dependent**  
(A-M) Whole membrane images of western blots represented in Figure 5A-5I.

# Figure S6

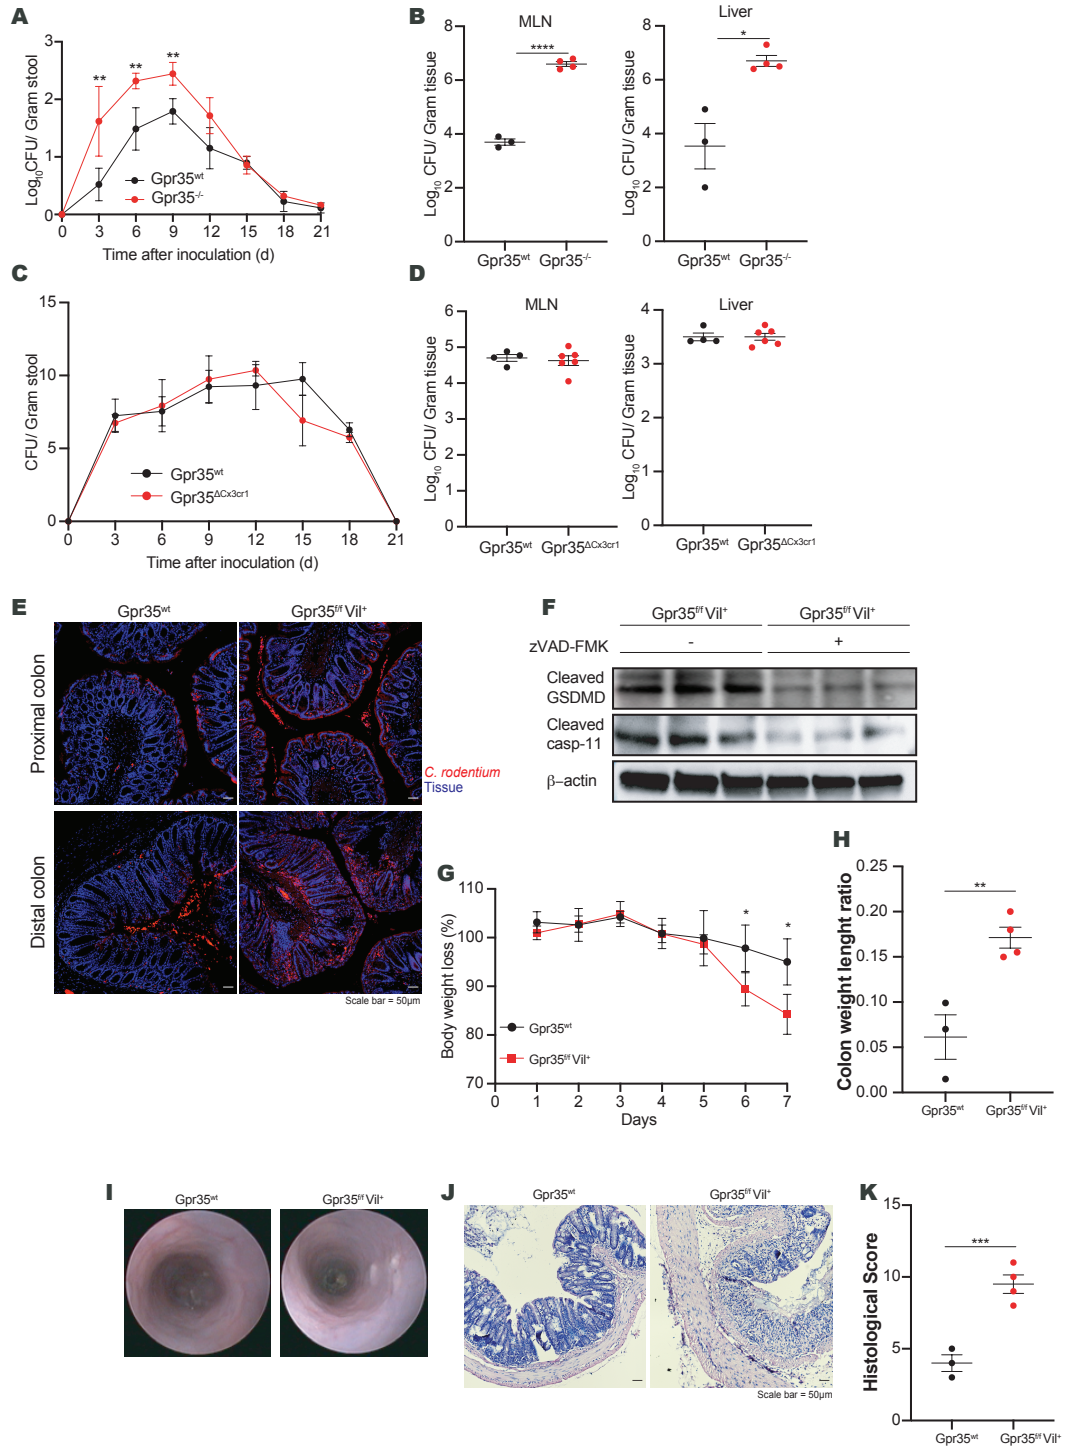

**Figure S6. Epithelial GPR35 protects against *Citrobacter rodentium* infection**

(A and B) *C. rodentium* CFU/g of (A) feces, (B) MLN and liver from *Gpr35*<sup>-/-</sup> (n = 4) and *Gpr35*<sup>wt</sup> (n = 3) co-housed littermates.

(C and D) *C. rodentium* CFU/g of (C) feces, (D) MLN and liver from *Gpr35*<sup>ΔCx3cr1</sup> (n = 6) and *Gpr35*<sup>wt</sup> (n = 4) co-housed littermates.

(E) Confocal microscopy images of proximal and distal colon sections infected obtained from *Gpr35*<sup>fl/fl</sup>*Vil*<sup>+</sup> and *Gpr35*<sup>wt</sup> co-housed littermates and infected with the *C. rodentium* mutant ICC 169 expressing the red fluorescent protein mRubby.

(F) Protein expression of cleaved GSDMD and cleaved caspase-11 in crypt samples isolated from the proximal colon obtained from *Gpr35*<sup>fl/fl</sup>*Vil*<sup>+</sup> mice treated with zVAD-FMK (n = 3) or not (n = 3).

(G) Body weight changes of *Gpr35*<sup>fl/fl</sup>*Vil*<sup>+</sup> (n = 4) and *Gpr35*<sup>wt</sup> (n = 3) co-housed littermates (normalized to initial weight).

(H) The colon weight/length ratio is represented as milligrams per centimeter of colon.

(I) Endoscopic images of *Gpr35*<sup>fl/fl</sup>*Vil*<sup>+</sup> and *Gpr35*<sup>wt</sup> mice.

(J) Representative H&E images of proximal colon sections obtained from *Gpr35*<sup>fl/fl</sup>*Vil*<sup>+</sup> and *Gpr35*<sup>wt</sup> co-housed littermates.

(K) Histology scores quantified from (I).

Each dot represents one animal with medians. Data are represented as mean ± SEM \*p ≤ 0.05, \*\*p ≤ 0.01, \*\*\*p ≤ 0.001, \*\*\*\*p ≤ 0.0001 by two-way ANOVA with Tukey's multiple comparisons test in (A), (C) and (F) or Mann-Whitney in (B), (D), (H) and (K).

**Table S2: q-PCR primers.**

|                 |                             |
|-----------------|-----------------------------|
| <i>Muc2 F</i>   | CCC AGA AGG GAC TGT GTA TG  |
| <i>Muc2 R</i>   | TGC AGA CAC ACT GCT CAC A   |
| <i>Atpb1 F</i>  | ACC TAC ACT TAA TCT CTA TGC |
| <i>Atpb1 R</i>  | GAA CAC TGC TCA CTA CAA     |
| <i>Slc2a1 F</i> | TAT CTC CAC ACT GTA GTC     |
| <i>Slc2a1 R</i> | CAG AGT TCG GTA TTA GTG     |
| <i>Cck F</i>    | AGG AAA CAA CCA CAC ATA CG  |
| <i>Cck R</i>    | AGC ATA GCA ACA TTA GGT CTG |
| <i>Sct F</i>    | CTG CTG TTG CTG CTG CTG     |
| <i>Sct R</i>    | CAT TCC GTC TGA GTG TCT TGG |
| <i>Gapdh F</i>  | CAT CAA GAA GGT GGT GAA GC  |
| <i>Gapdh R</i>  | CCT GTT GCT GTA GCC GTA TT  |

**Table S3: 16S primers.**

|         |                              |
|---------|------------------------------|
| Forward | GTG <b>N</b> CAGCMGCCGCGGTAA |
| Reverse | GGACTACHVGGGT <b>N</b> TCTAA |
